1 *Research article*

## 2 **Vertical Stratification in Urban Green Space Aerobiomes**

3 **Jake M. Robinson<sup>1, 2, 3, 4\*</sup>, Christian Cando-Dumancela<sup>3, 4</sup>, Craig Liddicoat<sup>3, 4, 5</sup>, Philip**  
4 **Weinstein<sup>4, 5</sup>, Ross Cameron<sup>1</sup>, and Martin F. Breed<sup>3, 4</sup>**

5 <sup>1</sup> Department of Landscape, The University of Sheffield S10 2TN, UK

6 <sup>2</sup> inVIVO Planetary Health, of the Worldwide Universities Network (WUN), West New York,  
7 NJ 10704, USA

8 <sup>3</sup> College of Science and Engineering, Flinders University, Bedford Park, SA 5042, Australia

9 <sup>4</sup> The Healthy Urban Microbiome Initiative (HUMI), Australia

10 <sup>5</sup> School of Public Health and the Environment Institute, University of Adelaide, Adelaide,  
11 SA, 5005, Australia

12

13 **Word count: 5,750; Figures: 7; Tables: 4**

14 **\* Correspondence:**

15 Corresponding Author

16 Jake Robinson [jmrobinson3@sheffield.ac.uk](mailto:jmrobinson3@sheffield.ac.uk)

17 **Keywords:** Aerobiome; COVID-19; Green Space; Microbiome; Microbiome-Inspired Green  
18 Infrastructure; Public Health; Urban Ecology; Urban Microbiome; Vertical Stratification

19

20

21

## 22 **Abstract**

23 Exposure to a diverse environmental microbiome is thought to play an important role in  
24 ‘educating’ the immune system and facilitating competitive exclusion of pathogens to  
25 maintain human health. Vegetation and soil are known to be key sources of airborne  
26 microbiota—the *aerobiome*. Only a limited number of studies have attempted to characterise  
27 the dynamics of the aerobiome, and no studies to date have investigated these dynamics from  
28 a vertical perspective simulating human exposure. Studies of pollution and allergenic pollen  
29 show vertical stratification at various scales, and present an expectation that such vertical  
30 stratification may also be present in the aerobiome. Such stratification could have important  
31 implications for public health and for the design, engineering and management of urban green  
32 spaces. For example, do children receive the same exposure to airborne microbiota as taller  
33 adults, and what are the downstream implications for health? In this study, we combine an  
34 innovative columnar sampling method at soil level, 0.0, 0.5, 1.0, and 2.0 m together with  
35 high-throughput sequencing of the bacterial 16S rRNA gene to assess whether significant  
36 vertical stratification of the aerobiome occurred in a parkland habitat in Adelaide, South  
37 Australia. Our results provide evidence of vertical stratification in both alpha and beta  
38 (compositional) diversity of airborne bacterial communities, with diversity increasing roughly  
39 with height. We also found significant vertical stratification in known pathogenic and  
40 beneficial bacterial taxa, suggesting potentially different exposure attributes between adults  
41 and children. These results could have important implications for public health and urban  
42 planning, potentially informing ways to optimise the design and management of health-  
43 promoting urban green spaces.

44

45

## 46 **1 Introduction**

47 Over the last 100 years, urban populations have increased dramatically (Cox et al. 2018).

48 Indeed, urbanisation is predicted to increase further with an estimated 60% of the world's  
49 population living in towns and cities by 2030 (Hake et al. 2016; Dogan and Gurcan, 2019).

50 The ecological footprint associated with increased urbanisation has exerted considerable  
51 pressure on both local and planetary systems (While and Whitehead, 2013; Maheshwari et al.  
52 2020). Moreover, a growing body of evidence now links urbanisation to the rise in  
53 noncommunicable diseases (NCDs) such as chronic inflammatory conditions (e.g.,  
54 autoimmune disorders and allergies) and the transmission of communicable diseases such as  
55 dengue fever, chikungunya and the recent COVID-19 outbreak (Andrea, 2019; Goryakin et  
56 al. 2017; Alirol et al. 2011; Ali and Dasti, 2018; Franchi, 2020; Wu et al. 2020).

57

58 Biodiversity loss is a global megatrend, with current species extinction rates estimated to be  
59 1,000 times higher than historical background rates, and future rates likely to increase to  
60 10,000 times higher (Haahtela et al. 2013; De Vos et al. 2015). This is driven in part by  
61 urbanisation, and associated processes including unsustainable land use, resource  
62 exploitation, pollution and climate change (Sol et al. 2014; Hughes, 2017; Crenna et al.  
63 2019). Importantly, the biodiversity loss and NCD global megatrends are thought to be  
64 interrelated (Von Hertzen et al. 2015; Haahtela, 2019).

65

66 Intensive land-use and reduced biodiversity at the macro-scale (e.g., substrates, plant  
67 communities and animals) is associated with reductions in biodiversity and structural changes  
68 at the micro-scale (i.e., the microbiome) (Bender et al., 2016; Heiman et al. 2016; Blum et al.  
69 2019; Liddicoat et al. 2019); yet microbiomes can be restored through revegetation (Gellie et  
70 al. 2017; Mills et al. 2020). These changes could have implications for human health as

71 exposure to a diverse suite of environmental microbes is important to ‘educate’, regulate and  
72 maintain the human immune system (Rook et al. 2003; Rook et al. 2013; Arleevskaya et al.  
73 2019). Furthermore, studies now link the microbiome to a plethora of maladies from  
74 Alzheimer’s disease and myalgic encephalomyelitis, through inflammatory bowel and skin  
75 diseases, to respiratory health (Hansom and Giloteaux, 2017; Prescott et al. 2017;  
76 Sokolowska et al. 2018; Aschard et al. 2019; Kowalski and Mulak, 2019).

77

78 Environmental factors are thought to be more important than genetic factors in shaping the  
79 composition of the gut microbiome (Rothschild et al. 2018). Indeed, prior research suggests  
80 that early life exposure to a diverse range of environmental microbes is particularly important  
81 (until the weaning age—typically 0-4 years); during this period the composition of the human  
82 gut microbiome is highly dynamic and readily colonised by environmental microbes (Yang et  
83 al. 2016; Moore and Townsend, 2019). However, recent research suggests the adult  
84 microbiome exhibits greater plasticity than previously thought. For example, Martinson et al.  
85 (2019) provided evidence to suggest that certain bacterial families in the adult human gut  
86 microbiome, such as *Enterobacteriaceae*, exhibit high levels of colonisation plasticity.  
87 Furthermore Schmidt et al. (2019) recently showed that one in three microbial cells from the  
88 oral environment pass through the digestive tract to settle and replenish the gut microbiome of  
89 healthy adult humans. Browne et al. (2016) showed that spore-forming bacteria (which  
90 survive in aerobic conditions) dominate the human gut, comprising 50-60% of bacterial  
91 genera, and display greater change in abundance and species over time compared to non-  
92 spore formers, suggesting that many gut bacteria may come and go from the environment.  
93 This presents a challenge to both the notion of an oral-gut barrier (Martinsen et al. 2005) and  
94 the level of microbiome stability in adulthood (D’Argenio and Salvatore, 2015; Stearns et al.  
95 2017). Is it therefore possible that exposure to environmental microbes remains important

96 throughout the life-course (e.g., for immunoregulation, competitive exclusion of pathogens,  
97 and homeostasis)?

98

99 Vegetation and soil are known to be key sources of airborne microbiota—i.e., the *aerobiome*  
100 (Joung et al. 2017; Liu et al. 2018). A small number of studies have attempted to characterise  
101 the community structure and spatiotemporal dynamics of the aerobiome. For example,  
102 Mhuireach et al. (2016) compared bioaerosol samples in green spaces and parking lots and  
103 found compositional distinctions in bacterial communities between the two land cover types.  
104 Furthermore, Mhuireach et al. (2019) explored spatiotemporal controls on the aerobiome and  
105 suggested that localised site factors were likely to be important in driving bacterial  
106 community structure. However, no known studies have investigated the spatial and  
107 compositional factors from a vertical perspective, simulating potential human exposures at  
108 different heights.

109

110 Support for the existence of aerobiome stratification can be drawn from studies of pollution,  
111 allergenic pollen and fluid dynamics of particulates where vertical stratification has been  
112 shown to occur at various scales. For example, in an internal environment and under  
113 ventilated conditions, Miles (2008) showed that NH<sub>3</sub> molecule concentrations decreased  
114 vertically with increasing distance from source (i.e., the ground). Gou and Nui (2007) found  
115 that vertical concentration stratification of particles up to PM<sub>10</sub> (10.0µm) occurred under  
116 different ventilation conditions. Particles smaller than 2.5µm were less affected by  
117 gravitational factors, and submicron particles with small relaxation times (i.e., the time  
118 required for particles to adjust their velocity to new conditions of forces) behaved more like  
119 trace gases following main airstreams. Alcázar et al. (1998) found higher concentration of  
120 *Urtica membranacea* pollen at the upper region of their sampling height range of 1.5 m-15 m,

121 and higher concentrations of *U. urens-Parietaria sp.* at lower heights—possibly due to pollen  
122 mass and different fluid dynamics.

123

124 The existence of aerobiome vertical stratification could have important implications for the  
125 design, engineering and management of urban green spaces—particularly those aimed at  
126 promoting public health via microbial exposure (Watkins et al. 2020). For example, do  
127 children receive the same exposure to airborne microbiota as taller adults? Do people who lie  
128 down or work close to the ground (e.g., gardeners bending over to dig) have different  
129 exposure levels to those who remain upright, and what are the downstream implications for  
130 health? Developing a refined understanding of this aerobiome-human interface could also  
131 have implications for the design and monitoring of nature-based health interventions, for  
132 example via green/nature prescribing (Robinson and Breed, 2019; Shanahan et al. 2019;  
133 Robinson et al. 2020).

134

135 Protocols for sampling the aerobiome to date have often included a reasonable yet arbitrary  
136 sampling height of 2 m (Airaudi et al. 1996; Cordeiro, 2010; Mhuireach et al. 2016;  
137 Domingue, 2017). Therefore, investigating aerobiome composition at various heights could  
138 provide important methodological insights to fine-tune future study protocols and public  
139 health recommendations. In this proof of concept study, we combine innovative columnar  
140 aerobiome sampling methods along with remote sensing techniques and high-throughput  
141 sequencing of the bacterial 16S rRNA gene. The primary objectives of this study were to: (a)  
142 assess whether significant vertical stratification in bacterial species richness and evenness  
143 (alpha diversity) of the aerobiome occurred; (b) assess whether significant compositional  
144 differences (beta diversity) between sampling heights occurred; and (c) to preliminarily assess

145 whether there were significant altitudinal differences in known pathogenic and beneficial  
146 bacterial taxa.

## 147 **2 Materials and Methods**

### 148 *2.1. Site selection*

149 Our study site comprised three vegetated plots totalling seven ha of the southern section of  
150 the Adelaide Parklands (Kaurna Warra Pintyanthi), South Australia. The justification for the  
151 selected study site was as follows:

- 152 1. Its broadly consistent soil geochemistry, as the southern Parklands generally fall within  
153 the Upper Outwash Plain soil boundary (coalescing alluvial soil, draining the Eden  
154 Fault Block).
- 155 2. This area is managed by a single division of the City of Adelaide, minimising variation  
156 in site management and allowing for simpler study logistics.
- 157 3. A single study site (i.e., the southern section) in the Parklands provided a degree of  
158 control over potential variation in landscape effects on the aerobiome (e.g., dominant  
159 vegetation type, distance to coast, elevation, orientation, aspect).
- 160 4. Urban Parkland is representative of conditions that both child and adult residents might  
161 be exposed to.

162 Following site selection, boundaries of three plots (as polygons) were defined in QGIS 3  
163 (v3.0.2). These polygons were subsequently converted to shapefiles (.shp) and a random point  
164 algorithm was generated. This provided randomly selected sampling points within each  
165 vegetated plot to include in our study (Figure 1). The spatial coordinates for each sampling  
166 point were recorded and programmed into a handheld global positioning system (GPS)

167 device. This was operated on site to allow us to identify the relevant locations for setting up  
168 the sampling stations.

169

### Sites selection for the aerobiome study (with randomised subsites)

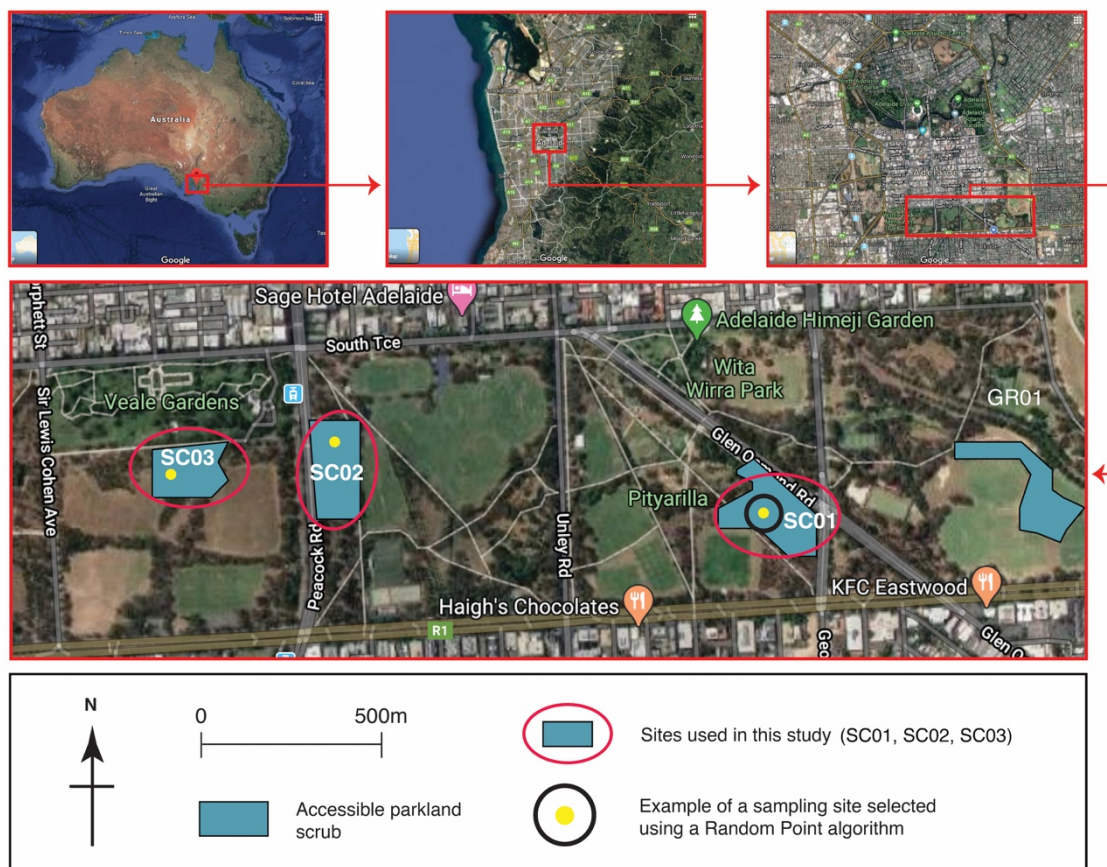

170

171 **Figure 1.** Location of study sites, showing the randomly selected sampling locations.

172

## 173 **2.2. Sampling equipment**

174 The sampling stations (Figure 2) were constructed using timber (SpecRite 42 mm x 28 mm x  
175 2.7 m screening Merbau). The sampling stations comprised a timber stand with 45° leg braces.  
176 Hooks and guy ropes were also installed, ensuring stability in the field. Steel brackets were  
177 installed to secure petri dishes, which we used to passively sample the aerobiome as per  
178 Mhuireach et al. (2016).



179

180 The level of stability was tested in two phases – *Phase 1*: during windy conditions (~Beaufort

181 scale No. 5) in a yard environment, and *Phase 2*: in situ, prior to the sampling phase.

182

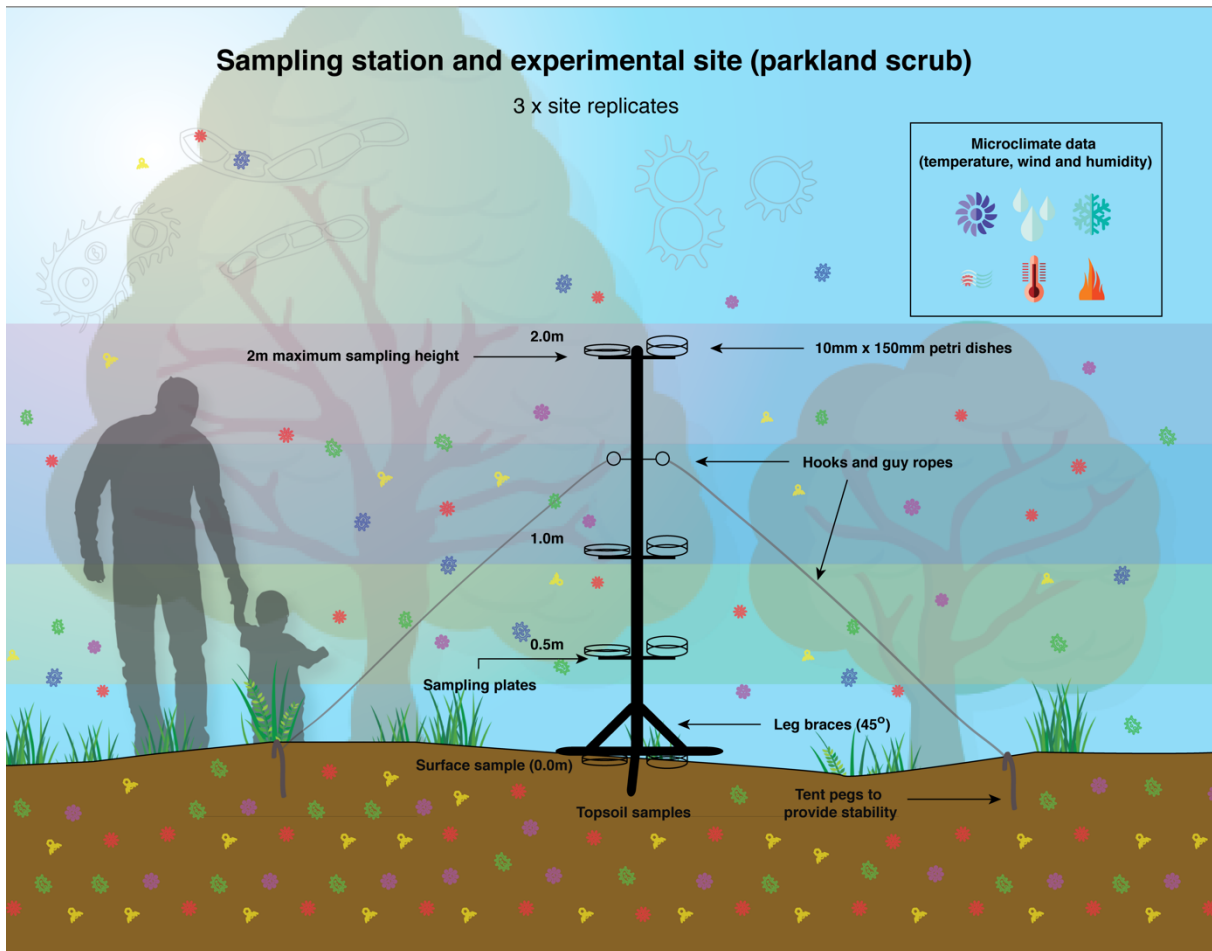

183

184 **Figure 2.** Design of the aerobiome vertical stratification sampling stations. These were installed in scrub habitat

185 in the Adelaide Parklands.

186

### 187 **2.3. Data loggers**

188 We installed temperature and relative humidity data loggers at each sampling station. Each

189 logger was programmed to record data at 8-second intervals for the entire sampling period.

190 The dataloggers were calibrated using a mercury thermometer and a sling psychrometer.

191

## 192 **2.4. On-site setup procedure**

193 The sampling stations were placed into position between 0600-0800hrs on 4th, 5th and 6th  
194 November 2019. This ensured sufficient time was allocated to travel between the sampling  
195 locations. From 0800hrs onwards and prior to installing the petri dishes for passive sampling,  
196 the sampling stations were decontaminated using a 5% Decon 90 solution. The microclimate  
197 data loggers were then decontaminated and installed on the sampling stations. The nearest  
198 trees (all <10 m height and 20 cm-50 cm in diameter at breast height) were between 2 m and  
199 5 m from the sampling stations.

200

## 201 **2.5. Sampling protocol**

202 The sampling procedure involved collecting soil samples (actively) and airborne microbiota  
203 (passively). Environmental metadata were also collected (e.g., windspeed, temperature and  
204 relative humidity). Soil pH at each site was measured using a digital pH meter (Alotpower).  
205 The probe of the pH meter was inserted into the soil and left for a period of 1-minute prior to  
206 taking a reading, as per manufacturer's instructions.

207

208 Windspeed and direction data for the entire study area were obtained from Adelaide's  
209 meteorological weather station at Ngayirdapira (West Terrace): Lat: -34.93, Lon: 138.58,  
210 Height: 29.32 m. Windspeed and direction was also recorded at each sampling site on an  
211 hourly basis (Mhuireach et al. 2016) using the handheld anemometer (Digitech *QM-1644*).

212

### 213 **2.5.1. Soil samples**

214 Topsoil samples were collected using a small shovel and stored in 50 mL sterile falcon tubes.  
215 The shovel was decontaminated using the 5% Decon 90 solution prior to use. Wearing gloves,  
216 we sampled five topsoil samples (depth: 5-7cm) at equidistant sampling points, 20-30 cm

217 from the central stem of each sampling station (Zarraonaindia et al. 2015). The soil samples  
218 were subsequently pooled and then homogenised, passed through a 1 mm pore sieve, and  
219 placed in new sterile 50 mL Falcon tubes. The sample tubes were labelled using a predefined  
220 labelling system. We included field controls of soil samples by opening 50 mL sterile falcon  
221 tubes for 60 s at each site (Mbareche et al. 2019). All soil and field control samples were  
222 immediately chilled by placing in an ice box in the field, and then storing at -80°C in the lab  
223 prior to DNA extraction and sequencing (Zarraonaindia et al. 2015). In total, we collected 15  
224 soil subsamples per sampling day across the three sampling stations for each of the three  
225 sampling days. Subsamples were pooled and homogenised by sampling station and day,  
226 which gave a total of nine homogenised samples (three per sampling station) plus three field  
227 controls.

228

### 229 ***2.5.2. Aerobiome samples***

230 Passive sampling methods were used to collect low biomass aerobiome samples following  
231 established protocols (Mhuireach et al. 2016; Mhuireach et al. 2019). Petri dishes (100 x 15  
232 mm) were attached with decontaminated Velcro tabs on the sampling stations at four  
233 sampling heights: ground level, 0.5 m, 1 m, and 2 m. The total height of the sampling stations  
234 was 2 m from ground level (95% of adult human heights lie within 2 SD at 1.93 m). One  
235 metre is the average height of a 4-year old child (typically the maximum weaning age—and  
236 the time when the gut microbiome is thought to become less plastic), the height of a pram  
237 bassinet, and the height of an adult sitting in a chair (Dettwyler 2017; Milani et al. 2017;  
238 RCPC, 2020). Fifty cm is the approximate height of a pushchair seat, and of an adult torso  
239 and head (representing the height of an adult sitting on the floor). The surface is also an  
240 important sampling level, for example, representing the point of contact for a crawling child

241 or an adult lying on the floor. The steel petri dish sampling plates were also decontaminated  
242 using the 5% Decon 90 solution prior to use.

243

244 The petri dishes were secured to the sampling stations (Figure 2) and were left open for 6-8  
245 hours (Mhuireach et al. 2016). At the end of the sampling period, we closed the petri dishes.

246 A new set of gloves was worn for the handling of petri dishes at each vertical sampling point

247 to reduce contamination. The petri dishes were then sealed using Parafilm, labelled,

248 immediately placed on ice, and transported to the laboratory for storage at -80°C prior to

249 DNA extraction (Mhuireach et al. 2019). Unused petri dishes were left open for 60 s, and then

250 sealed at each site as field controls. Dishes were later swabbed during the DNA extraction

251 process using nylon flocked swabs (FLOQSwabs Cat. No. 501CS01, Copan Diagnostics Inc.,

252 CA, USA) (Mhuireach et al. 2019; Bae et al. 2019; Liddicoat et al. 2020).

253

## 254 ***2.6. DNA extraction, amplification and sequencing***

255 We extracted DNA from samples at the Evolutionary Biology Unit (EBU), South Australian

256 Museum. The order of processing samples was randomised using a digital number

257 randomiser, including the soil samples (higher biomass), which were processed after the low

258 biomass, aerobiome samples to minimise cross-contamination.

259

260 The petri dishes for each sampling station were swabbed with FLOQSwabs for 30 s (with

261 consistent back and forth strokes) in a laminar flow cabinet type 1 (License No. 926207). The

262 base and lid samples for each height, station and date were then pooled, prior to extraction.

263 The swabs were cut with decontaminated scissors directly into labelled 2 mL Eppendorf

264 tubes. We used Qiagen QIAamp DNA Blood Mini Kits to extract DNA from the swabs

265 together with extraction blank controls, and Qiagen DNAeasy PowerLyzer Soil Kits to extract

266 DNA from the soil samples (and extraction blank controls). We followed the manufacturer's  
267 instructions throughout the extraction process.

268

269 PCR amplification was done in triplicate using the 341F/806R primer targeting the V3-V4  
270 region of the 16S rRNA gene (5' -CCTAYGGGRBGCASCAG- 3'/5' -

271 GGACTACNNGGGTATCTAAT- 3'). The 300 bp paired end run was sequenced on an

272 Illumina MiSeq platform at the Australian Genome Research Facility Ltd (AGRF) using two

273 flowcells (ID 000000000-CW9V6 and 000000000-CVPGT). Image analysis was done in real

274 time by the MiSeq Control Software (MCS) v2.6.2.1 and Real Time Analysis (RTA)

275 v1.18.54. Then the Illumina bcl2fastq 2.20.0.422 pipeline was used to generate the sequence

276 data.

277

## 278 ***2.7. Bioinformatics and statistical analysis***

279 Paired-end reads were assembled by aligning the forward and reverse reads using PEAR

280 (version 0.9.5). Primers were identified and trimmed. Trimmed reads were processed using

281 Quantitative Insights into Microbial Ecology (QIIME 1.8.4), USEARCH (version 8.0.1623),

282 and UPARSE software. Using USEARCH tools, reads were quality filtered, full length

283 duplicate reads were removed and sorted by abundance. Singletons or unique reads in the data

284 set were discarded. Reads were clustered and chimeric reads were filtered using the

285 "rdp\_gold" database as a reference. To obtain the number of reads in each operational

286 taxonomic unit (OTU), reads were mapped back to OTUs with a minimum identity of 97%.

287 Taxonomy was assigned using QIIME.

288

289 We used the phyloseq package (McMurdie and Holmes, 2013) in R to import and analyse the

290 sequencing data, and decontam (Davis et al. 2018) to identify and exclude contaminants.

291 Lower biomass samples (i.e., air, field blanks, and extraction blank controls) were analysed  
292 using the `isNotContaminant()` function, where contaminants were identified by increased  
293 prevalence in negative controls. Higher biomass samples (i.e., soil, and corresponding  
294 extraction blanks) were analysed using the `isContaminant()` function. Using `isContaminant()`,  
295 contaminants were identified by the frequency that varies inversely with sample DNA  
296 concentration, or by increased prevalence in negative controls. All taxa identified as  
297 contaminants were pooled and removed from further analysis. To estimate OTU alpha  
298 diversity we derived Shannon Index values based on rarefied abundances (Liddicoat et al.  
299 2019) in `phyloseq`. We generated box and violin plots with `ggplot2` (Wickham and Wickham,  
300 2007) to visualise the distribution of the alpha diversity scores for each sampling height.  
301 Microbial beta diversity was visualised using non-metric multidimensional scaling (NMDS)  
302 ordination of Bray-Curtis distances based on rarefied OTU abundances. The ordinations plots  
303 show low-dimensional ordination space in which similar samples are plotted close together,  
304 and dissimilar samples are plotted far apart.  
305  
306 We used permutational multivariate analysis of variance (PERMANOVA) to test for  
307 compositional differences between sampling heights. The Pearson's product-moment and  
308 Spearman's rank correlation tests were used to examine correlations between sampling height  
309 and alpha diversity scores. A Mann-Whitney Wilcoxon test was used to examine differences  
310 in alpha diversity between merged air sampling heights (0.0 -0.5 m and 1.0-2.0 m) and a  
311 Kruskal Wallace chi-squared test to explore differences in correlations between sites and  
312 dates. We also calculated OTU relative abundances using the `phyloseq` package in R to  
313 examine the distribution of taxa that have potential implications for public health. To compare  
314 presence and proportions of taxa we used 2-sample tests for equality of proportions with

315 continuity corrections and created radial charts using pivot tables with comma separated value  
316 (csv) files.

317

### 318 3 Results

319 We observed a significant negative correlation between alpha diversity (air and soil for all  
320 sites/dates) and sampling height ( $r = -0.58$ ,  $df = 38$ ,  $P = <0.01$ ; Figure 3A; Table 1).

321 Alpha diversity ranged from 1 to 6 and was highest at soil level followed by the lower air  
322 sampling levels (0.0 m-0.5 m) and the upper sampling levels (1.0 m-2.0 m), respectively.

323

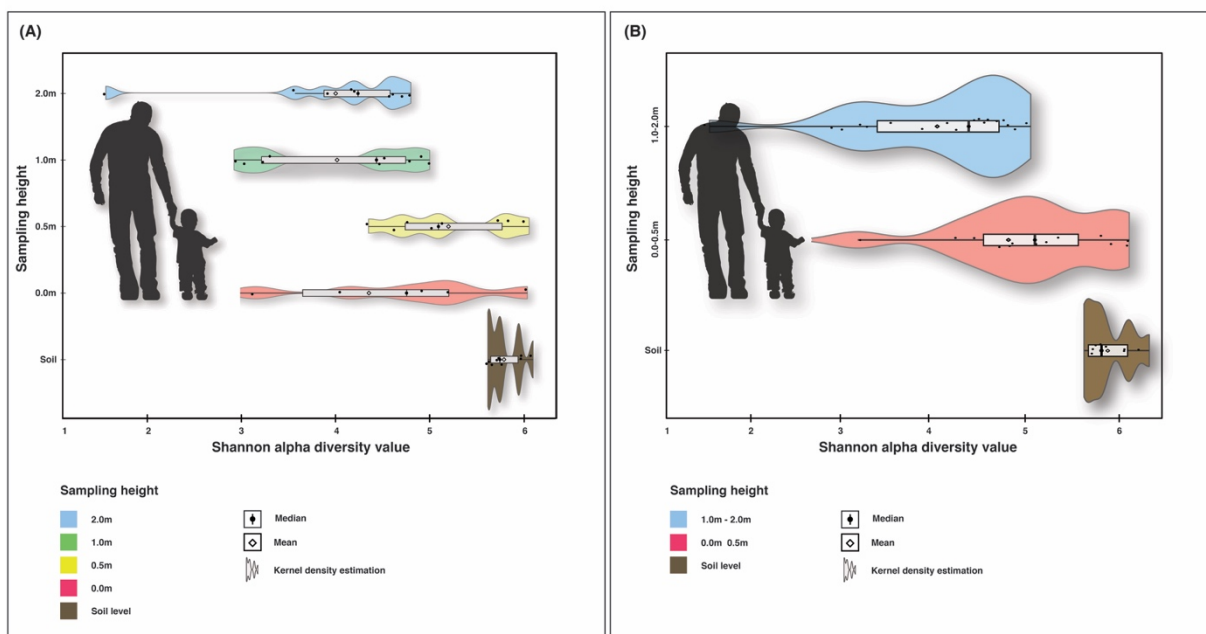

324

325 **Figure 3.** Box/violin plots of Shannon alpha diversity scores for each sampling height including soil (A) and for  
326 merged lower heights 0.0-0.5 m and upper heights 1.0-2.0 m, with soil (B). Plots also display mean values,  
327 interquartile range and kernel density estimation.

328

329 **Table 1.** Shannon alpha diversity scores for each spatial and temporal replicate, along with means and standard  
330 deviations.

| <b>Days/sampling height</b> | <b>Scrub 01 (SC01)</b>                             | <b>Scrub 02 (SC02)</b>                             | <b>Scrub 03 (SC03)</b>                             | <b>Mean (<math>\pm</math> SD)</b> |
|-----------------------------|----------------------------------------------------|----------------------------------------------------|----------------------------------------------------|-----------------------------------|
|                             | <b>Shannon <math>\alpha</math> diversity score</b> | <b>Shannon <math>\alpha</math> diversity score</b> | <b>Shannon <math>\alpha</math> diversity score</b> |                                   |
| <b>Day 1</b>                |                                                    |                                                    |                                                    |                                   |
| Soil                        | 5.73                                               | 5.60                                               | 5.93                                               | 5.75 $\pm$ 0.16                   |
| 0.0 m                       | 5.26                                               | 6.01                                               | 4.74                                               | 5.34 $\pm$ 0.63                   |
| 0.5 m                       | 4.63                                               | 5.82                                               | 5.72                                               | 5.39 $\pm$ 0.66                   |
| 1.0 m                       | 4.43                                               | 3.21                                               | 4.48                                               | 4.04 $\pm$ 0.71                   |
| 2.0 m                       | 1.54*                                              | 3.87                                               | 4.53                                               | 3.31 $\pm$ 1.57                   |
| <b>Day 2</b>                |                                                    |                                                    |                                                    |                                   |
| Soil                        | 5.63                                               | 5.60                                               | 5.93                                               | 5.72 $\pm$ 0.18                   |
| 0.0 m                       | -                                                  | 3.15                                               | 4.15                                               | 3.65 $\pm$ 0.70                   |
| 0.5 m                       | 4.35                                               | 6.01                                               | 5.14                                               | 5.16 $\pm$ 0.83                   |
| 1.0 m                       | 3.01                                               | 4.86                                               | 2.90                                               | 3.59 $\pm$ 1.10                   |
| 2.0 m                       | 4.67                                               | 4.79                                               | 4.14                                               | 4.53 $\pm$ 0.34                   |
| <b>Day 3</b>                |                                                    |                                                    |                                                    |                                   |
| Soil                        | 5.68                                               | 5.74                                               | 6.00                                               | 5.81 $\pm$ 0.17                   |
| 0.0 m                       | -                                                  | -                                                  | -                                                  | -                                 |
| 0.5 m                       | 4.77                                               | 5.02                                               | -                                                  | 4.89 $\pm$ 0.17                   |
| 1.0 m                       | 3.28                                               | 4.98                                               | 4.74                                               | 4.33 $\pm$ 0.92                   |
| 2.0 m                       | 4.57                                               | 3.53                                               | 4.23                                               | 4.11 $\pm$ 0.53                   |

331 - = missing data (failed to reach minimum DNA concentrations); \* = outlier.

332



333 When the lower sampling heights and the upper sampling heights were merged (0.0 with 0.5  
334 m; 1.0 m with 2.0 m), we observed a significant negative correlation between alpha diversity  
335 and sampling height ( $r = -0.68$ ,  $df = 38$ ,  $P = <0.01$ ) (Figure 3B). Following an examination of  
336 alpha diversity scores for individual sites and dates, all variants showed negative correlations  
337 between alpha diversity and sampling height. Four out of six indicated strong and significant  
338 relationships (Day 1:  $r = -0.76$ ,  $P = 0.00$ ; Day 3:  $r = -0.64$ ,  $P = 0.01$ ; SC01:  $r = -0.68$ ,  $P =$   
339  $<0.01$ ; and, SC03:  $r = -0.73$ ,  $P = 0.01$ ; Table 2).

340

341 With the merged sampling heights, all correlations increased in strength and were all  
342 statistically significant (Table 2). A Mann-Whitney Wilcoxon test for differences in alpha  
343 diversity between the merged air sampling heights (0.0m-0.5m and 1.0m-2.0m) showed a  
344 statistically significant difference ( $W = 188$ ,  $P = <0.01$ ). A Kruskal Wallance chi-squared test  
345 indicated no significant difference in correlations between sites or dates ( $P = 0.44$ ).

346

347 **Table 2.** Pearson's correlation scores of alpha diversity and sampling height based on all air and soil samples,  
348 followed by merged air sampling heights (0.0m-0.5m and 1.0m-2.0m) and soil samples. Correlation scores for  
349 each sampling date and site are included.

| Days/sites       | <i>r</i> score | <i>df</i> | <i>P</i> -value |
|------------------|----------------|-----------|-----------------|
| Day 1 (04-11-19) | -0.76          | 11        | <0.01***        |
| Day 2 (05-11-19) | -0.31          | 12        | 0.17            |
| Day 3 (06-11-19) | -0.64          | 11        | 0.01**          |
| Scrub 01 (SC01)  | -0.68          | 13        | <0.01***        |
| Scrub 02 (SC02)  | -0.41          | 12        | 0.14            |
| Scrub 03 (SC03)  | -0.73          | 9         | 0.01**          |

*Merged air sampling heights (0.0m-0.5m and 1.0m-2.0m):*

|                  |       |    |          |
|------------------|-------|----|----------|
| Day 1 (04-11-19) | -0.76 | 11 | <0.01*** |
| Day 2 (05-11-19) | -0.59 | 12 | 0.02*    |
| Day 3 (06-11-19) | -0.72 | 11 | <0.01*** |
| Scrub 01 (SC01)  | -0.72 | 13 | <0.01*** |
| Scrub 02 (SC02)  | -0.54 | 12 | 0.04*    |
| Scrub 03 (SC03)  | -0.86 | 9  | <0.01*** |

350 <0.01 '\*\*\*\*' 0.01 '\*\*\*' 0.05 '\*\*'

351 Using these same merged sampling heights, a 2-sample test for equality of proportions with  
 352 continuity correction showed a significant difference in proportions of taxa that occurred in  
 353 lower air sampling heights (compared to upper sampling heights) that also occurred in the soil  
 354 samples. The positive relationship between the proportion of taxa occurring in the air that also  
 355 occurred in the soil decreased as vertical distance from the soil increased. For example, at the  
 356 genus level, 84.4% of taxa in the lower air samples also occurred in the soil samples, whereas  
 357 only 76.1% of the taxa in the upper air samples occurred in the soil. This difference was  
 358 statistically significant (Chi-squared = 9.5376, df = 1,  $P = <0.01$ ; Figure 4 shows taxonomic  
 359 breakdown).

360

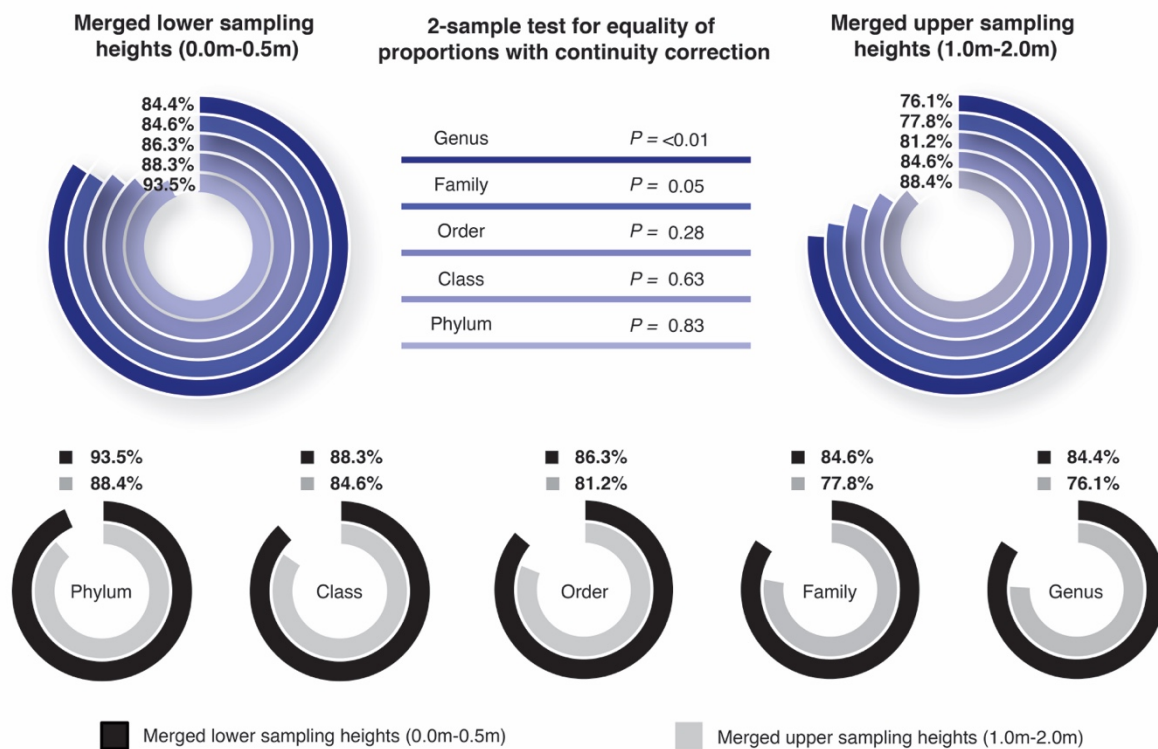

361

362 **Figure 4.** Radial charts showing proportions (as %) of taxa from the air samples that also occurred in the soil  
 363 samples for each sampling height and across all available taxonomic levels. A 2-sample test for equality of  
 364 proportions shows significant differences between lower and upper sampling heights for both genus and family  
 365 taxonomic levels.

366

367 Sampling heights displayed distinct bacterial signatures (Figure 5, panel A). Sampling height  
 368 explained 22% of the variation in environmental microbiota when all air sampling heights and  
 369 the soil level were included, and this was statistically significant (PERMANOVA  $df = 4$ ,  $F =$   
 370  $2.50$ ,  $R^2 = 0.22$ ,  $P = <0.01$ , permutations = 999).

371

372 When analysing air samples in isolation, sampling height explained 11% of the variation in  
 373 environmental microbiota, however, this was not significant ( $df = 3$ ,  $F = 1.18$ ,  $R^2 = 0.11$ ,  $P =$   
 374  $0.15$ , permutations = 999). When we merged within lower and upper sampling heights,  
 375 sampling heights explained 6% of the variation and this was statistically significant ( $df = 1$ ,  $F$   
 376  $= 1.98$ ,  $R^2 = 0.06$ ,  $P = 0.01$ , permutations = 999) (Figure 5, panel B).

377

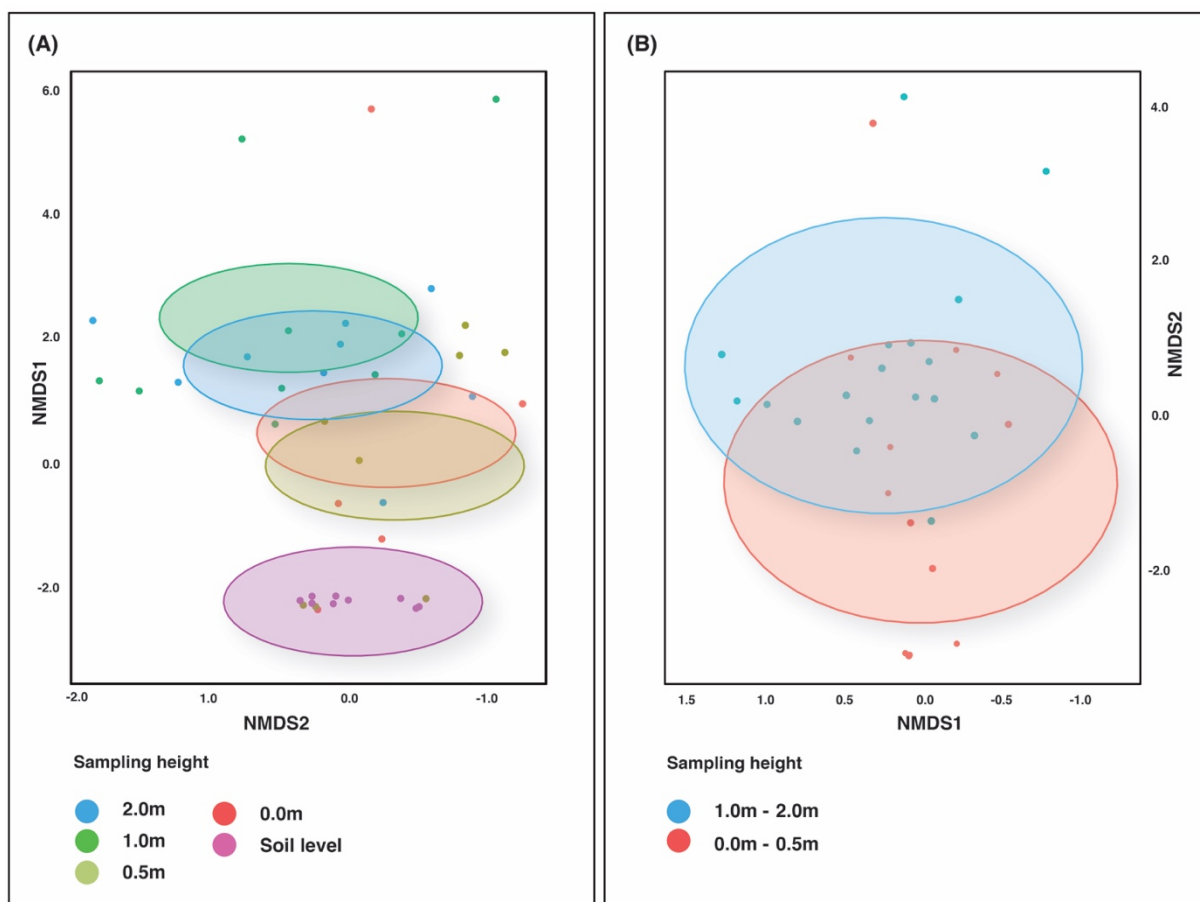

378

379 **Figure 5.** NMDS ordination of bacterial communities for all sampling heights, including soil (A) (Stress: 0.09)

380 and for all sampling heights, excluding soil and merging within lower and upper samples (B) (Stress: 0.10).

381 Ellipses represent Euclidian distance from the centre.

382

383 The dominant taxa in the soil and lower sampling heights were Actinobacteria (based on

384 mean relative abundance >1%), and the dominant taxa in the upper sampling heights were

385 Proteobacteria (Figure 6; segments 1 and 9). A significantly greater proportion of

386 Actinobacteria were present in lower air sampling heights (merged 0.0m-0.5m; 43.52% and

387 26.61%, respectively;  $\bar{x}$  = 35.07%) compared to upper air sampling heights (merged 1.0m-

388 2.0m; 17.52% and 19.67%, respectively;  $\bar{x}$  = 18.59%) (Chi-squared = 6.1032, df = 1,  $P$  =

389 0.01).

390

391 A significantly greater proportion of Proteobacteria was present in the upper air sampling  
 392 heights (merged 1.0m-2.0m; 43.78% and 49.50% respectively;  $\bar{x} = 46.64\%$ ) compared to the  
 393 lower air sampling heights (merged 0.0m-0.5m; 27.11% and 28.14%, respectively;  $\bar{x} =$   
 394 27.63%) (Chi-squared = 6.9471,  $df = 1$ ,  $P = <0.01$ ).

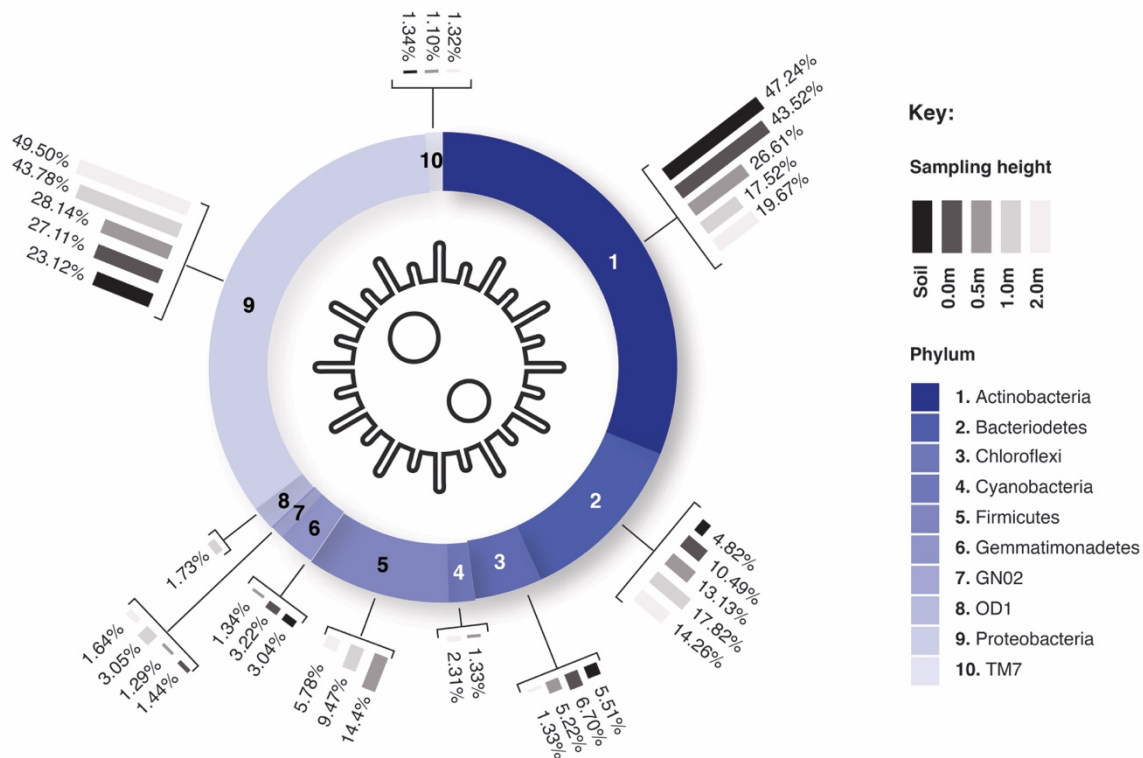

395  
 396 **Figure 6.** Relative abundance of bacterial OTUs at the phylum taxonomic level (based on mean relative  
 397 abundance >1% for each sampling height). Ring segments relate to phyla; segment size corresponds to mean  
 398 relative abundance across all heights; mini bar charts relate to relative abundance of taxa for individual sampling  
 399 heights where applicable. Actinobacteria (1) dominate lower sampling heights, Proteobacteria (9) dominate  
 400 upper sampling heights.

401

402 A number of relatively abundant and notable taxa (contingent primarily on their implications  
 403 for public health) were identified in the samples. The relative abundance of these taxa  
 404 differed across sampling heights and all significantly correlated with sampling height, ranging

405 from moderate to strong relationships (Table 3) These taxa and their potential implications for  
 406 public health are highlighted further in Table 4 in the Discussion.

407

408 **Table 3.** Spearman's correlations for notable taxa at the genus level across sampling heights, based on mean  
 409 relative abundance (>1%) for each sampling height.

| Number | Taxa (genus)          | $r_s$ score | S     | <i>P</i> -value |
|--------|-----------------------|-------------|-------|-----------------|
| 1      | <i>Streptomyces</i>   | -0.66       | 23596 | <0.01***        |
| 2      | <i>Kingella</i>       | +0.39       | 8606  | <0.01***        |
| 3      | <i>Lactobacillus</i>  | +0.54       | 6470  | <0.01***        |
| 4      | <i>Flavobacterium</i> | +0.53       | 6639  | <0.01***        |
| 5      | <i>Sphingomonas</i>   | +0.39       | 8577  | <0.01***        |

410

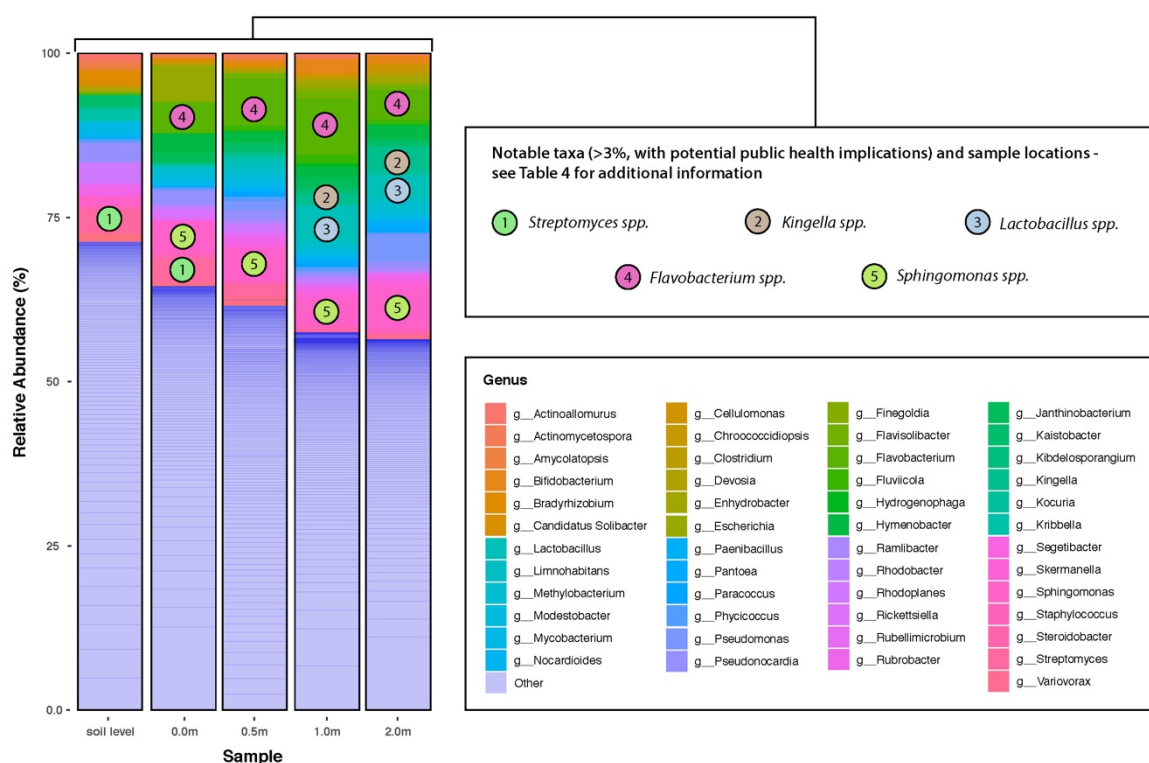

411

412 **Figure 7.** Relative abundance of bacterial OTUs at the genus taxonomic level and identification of notable taxa.

413 Refer to Table 4 for potential public health implications of notable taxa.

## 414 4 Discussion

### 415 4.1. *Vertical stratification of aerobiome alpha diversity*

416 Here we show that vertical stratification of aerobiome alpha diversity occurred. This  
417 transpired as a significant association in the reduction of bacterial alpha diversity as height  
418 increased (i.e., between the ground surface level and two vertical meters of the air column).  
419 When considering all sampling heights, alpha diversity reduced with greater height. This  
420 vertical stratification in alpha diversity was neither spatially (i.e., site specific) or temporally  
421 dependent. The strength of the negative relationship between alpha diversity and height  
422 increased when we merged lower sampling heights (0.0m with 0.5m) and the upper sampling  
423 heights (1.0m with 2.0m). This implies that the required spatial frequency to elucidate vertical  
424 stratification in alpha diversity—specifically, five sampling heights across a 2 m vertical  
425 transect—may have been overestimated. However, several omissions in the lower sampling  
426 heights due to failure to reach minimum DNA concentrations could have affected the strength  
427 of this association.

428

429 The decay in observed alpha diversity as height increased could be the result of increasing  
430 distance from the primary source, that is, potentially the soil. It is widely accepted that soil  
431 represents one of the most microbially-diverse terrestrial habitats (Briones, 2014; Bender et  
432 al. 2016; Dumbrell, 2019; Zhu et al. 2019). Therefore, it seems reasonable to suggest that  
433 lower sampling heights may possess a higher level of microbial diversity as they are closer to  
434 a potentially greater concentration of microbiota. We observed that a greater proportion of  
435 bacteria taxa found in the lower sampling heights (compared to the upper sampling heights)  
436 were also present in the soil samples, both at genus and family levels. Together, these results  
437 suggest that soil does appear to play a key role in supplementing the local aerobiome,  
438 particularly at lower heights.

439

440 The presence of vertical stratification of bacterial diversity in the aerobiome could have  
441 important implications for human health. Indeed, exposure to environmental microbes is  
442 thought to prime and ‘educate’ the immune system (Belkaid and Hand, 2014; Hanski, 2014;  
443 Minchim et al. 2020) particularly in early life, and a recent mouse study suggests that  
444 exposure to environmental microbes such as the butyrate-producer *Kineothrix alysoides* could  
445 also have anxiolytic (anxiety-reducing) effects (Liddicoat et al. 2019). The vertical  
446 stratification concept could also be important for exposome researchers, who investigate the  
447 types and methods of exposures to both endogenous and exogenous chemical composites  
448 (including microbes and their biological compounds across the life-course) (Escher et al.  
449 2017; Daiber et al. 2019; McCall et al. 2019). The presence of vertical stratification implies  
450 that the potential for exposure to environmental microbial diversity may differ throughout the  
451 human life-course due to age and gender differences in height, activity types, and methods of  
452 motion.

453

#### 454 **4.2. Vertical stratification of aerobiome beta diversity**

455 We also showed vertical stratification of aerobiome beta diversity, where sampling height  
456 explained 22% of the variation in environmental microbiota when all sampling heights were  
457 included. This was corroborated by the analysis of equality of taxonomic proportions between  
458 the air and the soil samples. As mentioned, the proportion of bacterial taxa from the air  
459 samples that were also present in the soil decreased as altitude increased. This provides  
460 preliminary evidence that soil has a stronger influence on aerobiome composition at lower  
461 heights and allochthonous sources make a key contribution to the aerobiome higher up.

462



463 It is likely that distance to source makes a key contribution to aerobiome vertical  
464 stratification. However, there may be other important biophysical driving factors. For  
465 example, the size range of bacterial cells can vary by eight orders of magnitude (from 0.013  
466  $\mu\text{m}$  to 750  $\mu\text{m}$ ) (Levin and Angert, 2015). However, many bacteria are thought to occur in the  
467 0.3-5  $\mu\text{m}$  range (Schaechter, 2016). Bacteria can also nucleate and exist as ‘clumps’ or adhere  
468 to larger suspended particles, thus altering their net particle size that would influence their  
469 fluid dynamics (Tham and Zuraimi, 2005; Haas et al. 2013; Gong et al. 2020). Airborne  
470 bacterial concentrations can be influenced by several factors including ambient temperature,  
471 humidity, wind dynamics and PM concentrations (Gong et al. 2020), and these factors could  
472 also play important roles in vertical stratification, and warrant further research.

473

474 Vertical stratification in bacterial *beta* diversity could also have important implications for  
475 public health. For example, our results point to intriguing questions such as: (a) are there  
476 significant and consistent differences in beneficial and pathogenic bacterial assemblages at  
477 different altitudes in the aerobiome? (b) does this significantly affect exposure and  
478 colonisation in humans across the life-course? (c) what are the downstream health  
479 implications of this, if any? We provide a preliminary contribution towards answering  
480 question (a), as discussed in the following section.

481

### 482 **4.3. Relative abundances and notable taxa**

483 Following the analyses of relative abundances, the dominant taxa in the soil and lower  
484 sampling heights were found to be Actinobacteria, and the dominant taxa in the upper  
485 sampling heights were Proteobacteria. This is not surprising given that a large proportion of  
486 terrestrial Actinobacteria are soil-dwelling organisms (Barka et al. 2016; Zhang et al. 2019),  
487 and both phyla are amongst the largest in the bacterial domain (Verma et al. 2013; Polkade et

488 al. 2016; Rizzatti et al. 2017). Other studies have shown similar dominant roles for these  
489 phyla in the aerobiome (Arfken et al. 2015; Maki et al. 2017; Li et al. 2018), but vertical  
490 stratification has not, to our knowledge, been explored.

491  
492 We identified a number of notable dominant taxa at the genus-level, including: *Streptomyces*,  
493 *Kingella*, *Lactobacillus*, *Flavobacterium*, and *Sphingomonas*. With the exception of  
494 *Flavobacterium*, species in these genera are known to have either beneficial or pathogenic  
495 impacts on human health. For example, the Actinobacteria *Streptomyces spp.*, is considered to  
496 be a microbial ‘old friend’ and potentially beneficial to human health via production and  
497 regulation of anti-proliferative, anti-inflammatory and antibiotic compounds (Bolourian and  
498 Mojtahedi, 2018; Nguyen et al. 2020). This genus had higher relative abundance at lower  
499 sampling heights. On the other hand, members of the *Kingella* genus such as *K. kingae* are  
500 considered to be pathogenic to humans, for example—causing debilitating conditions such as  
501 osteomyelitis and septic arthritis, particularly in children (Kiang et al. 2005; Nguyen et al.  
502 2018; Ingersol et al. 2019). These findings warrant further research—because if consistent  
503 across time and space, the spatial and compositional differences in microbiota have the  
504 potential to be important considerations for public health through the modulation of exposure.

505  
506 **Table 4.** Notable taxa (OTUs at the genus level) identified during the examination for bacterial relative  
507 abundance – based on mean relative abundance (>1%) for each sampling height. These taxa may have important  
508 public health implications as highlighted in the third column.

| Number | Notable taxa             | Potential public health implication                                                                                                                                                                                                                |
|--------|--------------------------|----------------------------------------------------------------------------------------------------------------------------------------------------------------------------------------------------------------------------------------------------|
| 1      | <i>Streptomyces spp.</i> | These Actinobacteria are relatively more abundant at lower (vertically) sampling levels. They are soil-associated but also considered to be ‘old friends’ with potential beneficial implications for human health (Bolourian and Mojtahedi, 2018). |

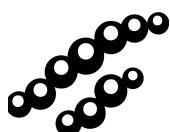

- 
- 2      *Kingella spp.*      Higher relative abundance at upper (vertical) levels. The gram negative *K. kingae* is considered to be pathogenic to humans – causing osteomyelitis and septic arthritis, particularly in children (Kiang et al. 2005; Nguyen et al. 2018).
- 
- 3      *Lactobacillus spp.*      Gram positive Firmicutes, relatively more abundant at upper levels. Some species are widely considered to be beneficial ‘old friends’ and probiotics in humans and other ecosystems (Rook et al. 2014) (e.g., *L. acidophilus*; *L. plantarum*; *L. rhamnosus*).
- 
- 4      *Flavobacterium spp.*      Soil and water-dwelling Bacteroidetes bacteria. These are present in all levels but with highest relative abundance at upper levels. Generally not considered to be pathogenic to humans. Spatial distribution suggests potential allochthonous deposition.
- 
- 5      *Sphingomonas spp.*      These are Proteobacteria, found in a variety of environments. Relatively abundant in all sampling heights but less so in the soil level. These organisms are not considered to be pathogenic to humans and can in fact be highly beneficial via their ability to break down polycyclic aromatic hydrocarbons, which are deleterious to human health (Macchi et al. 2018; Asaf et al. 2020).
- 

---

509

## 510    **5    Limitations**

511    As a proof of concept study, we have demonstrated, for the first time, the presence of vertical  
512    stratification of microbial alpha and beta diversity at lower levels of the biosphere (ground  
513    level to 2.0 m high). However, we have not established the generalisability of our findings  
514    with a large number of replicates in different environments. Further, following the DNA  
515    extraction process, three samples (each at SC03 0.0 m) failed to reach sufficient DNA

516 concentrations to enable PCR and sequencing, which may have affected the vertical  
517 stratification relationship—we can only speculate that the relationship would have been  
518 stronger with their inclusion. There are many sensitive variables involved with processing  
519 low biomass samples (Eisenhofer et al. 2019; McArdle and Kaforou, 2020) and perhaps even  
520 more stringent workflows are required for passive sampling.

521

## 522 **6 Conclusions**

523 We provide support for the presence of aerobiome vertical stratification in bacterial diversity  
524 (alpha and beta), and demonstrate that significant spatial differences in known pathogenic and  
525 beneficial bacterial taxa occur. Although the need to promote healthy ecosystems and  
526 understand environmental microbial exposures has always been important, in light of the  
527 COVID-19 pandemic, it is now justifiably at the forefront of many public health agendas  
528 worldwide. As discussed, there is growing evidence to suggest that exposure to the  
529 microbiome in biodiverse green spaces contributes towards ‘educating’ the immune system  
530 (Rook et al. 2003; Rook et al. 2013; Arleevskaya et al. 2019; Liddicoat et al. 2020).

531 Furthermore, the microbiome is thought to support the immune system’s defensive role  
532 against pathogens, and prevent hyper-inflammatory responses and metabolic dysregulation—  
533 risk factors for severe COVID-19 (Torres et al. 2019; Guo et al. 2020). Gaining a greater  
534 understanding of the transmission routes and physical factors (such as the vertical differential)  
535 affecting our exposure to environmental microbiomes—including both beneficial and  
536 pathogenic species—is likely to play an increasingly important role in the health sciences.

537

538 Strategies to explicitly consider the microbiome as part of health-promoting urban green  
539 spaces have recently been proposed, such as Microbiome-Inspired Green Infrastructure

540 (MIGI) (Robinson et al. 2018; Watkins et al. 2020). Further exploration of aerobiome vertical  
541 stratification could make an important contribution to this approach. For example, there could  
542 be value in determining whether different habitats and vegetation management regimes  
543 impact vertical stratification in urban green spaces, and elucidating the downstream health  
544 effects on urban dwellers. Building on our findings—that vertical stratification did occur in an  
545 urban green space aerobiome—has the potential to inform future exposome research, urban  
546 biodiversity management, and disease prevention strategies.  
547

548 **Conflicts of Interest**

549 *The authors declare that the research was conducted in the absence of any commercial or*  
550 *financial relationships that could be construed as a potential conflict of interest.*

551

552 **Author Contributions**

553 J.M.R and M.F.B contributed to the conception and design of the study; J.M.R and C.C.D  
554 conducted the field and lab work; J.M.R and C.L conducted the bioinformatics and data  
555 analysis; J.M.R wrote the manuscript; J.M.R produced the figures and data visualisations;  
556 J.M.R, C.C.D, C.L, P.W, R.C, and M.F.B contributed to manuscript internal critical review  
557 process and revisions. All authors read and approved the submitted version.

558

559 **Funding**

560 J.M.R is undertaking a PhD through the White Rose Doctoral Training Partnership  
561 (WRDTP), funded by the Economic and Social Research Council (ESRC).

562

563 **Data Accessibility Statement**

564 All data and code used in this study are available on the *UK Data Service ReShare* at  
565 <https://reshare.ukdataservice.ac.uk>; Data Collection #854411. All 16S rRNA gene sequences  
566 have been deposited in the European Nucleotide Archive (accession no. ERC000025).

567

568

569

570 **Acknowledgements**

571 We acknowledge and pay our respects to the Kaurna people, the traditional custodians whose  
572 ancestral lands we conducted the research on for this study. We also acknowledge the City of  
573 Adelaide who helped to facilitate this study through time and resources.

574 **7 References**

- 575 1. Airaudi D, Marchisio VF. Fungal biodiversity in the air of Turin. *Mycopathologia*,  
576 1996 Nov 1;136(2):95-102.
- 577
- 578 2. Alcázar P, Galán C, Cariñanos P, Domínguez-Vilches E. Vertical variation in  
579 Urticaceae airborne pollen concentration. *Aerobiologia*. 1998 Sep 1;14(2-3):131-4.  
580
- 581 3. Alirol E, Getaz L, Stoll B, Chappuis F, Loutan L. Urbanisation and infectious diseases  
582 in a globalised world. *Lancet Infect Dis*. 2011 Feb 1;11(2):131-41.  
583
- 584 4. Ali I, Dasti JI. Chikungunya virus: an emerging arbovirus in Pakistan. *J Pak Med*  
585 *Assoc*. 2018 Feb 1;68(2):252-7.  
586
- 587 5. Andrea L. Why urbanisation and health?. *Acta Bio Medica: Atenei Parmensis*.  
588 2019;90(2):181.  
589
- 590 6. Arleevskaya MI, Aminov R, Brooks WH, Manukyan G, Renaudineau Y. Shaping of  
591 Human Immune System and Metabolic Processes by Viruses and Microorganisms.  
592 *Front Microbiol*. 2019;10:816.  
593
- 594 7. Asaf S, Numan M, Khan AL, Al-Harrasi A. Sphingomonas: from diversity and  
595 genomics to functional role in environmental remediation and plant growth. *Crit Rev*  
596 *Biotechnol*. 2020 Jan 4:1-5.  
597



## Aerobiome Vertical Stratification

- 598 8. Aschard H, Laville V, Tchetgen ET, Knights D, Imhann F, Seksik P, Zaitlen N,  
599 Silverberg MS, Cosnes J, Weersma RK, Xavier R. Genetic effects on the commensal  
600 microbiota in inflammatory bowel disease patients. *PLoS Genet.* 2019 Mar  
601 8;15(3):e1008018.
- 602
- 603 9. Bae S, Lyons C, Onstad N. A culture-dependent and metagenomic approach of  
604 household drinking water from the source to point of use in a developing country.  
605 *Water Res X.* 2019 Feb 1;2:100026.
- 606
- 607 10. Barka EA, Vatsa P, Sanchez L, Gaveau-Vaillant N, Jacquard C, Klenk HP, Clément  
608 C, Ouhdouch Y, van Wezel GP. Taxonomy, physiology, and natural products of  
609 Actinobacteria. *Microbiol Mol Biol Rev.* 2016 Mar 1;80(1):1-43.
- 610
- 611 11. Belkaid Y, Hand TW. Role of the microbiota in immunity and inflammation. *Cell.*  
612 2014 Mar 27;157(1):121-41.
- 613
- 614 12. Bender SF, Wagg C, van der Heijden MG. An underground revolution: biodiversity  
615 and soil ecological engineering for agricultural sustainability. *Trends Ecol Evol.* 2016  
616 Jun 1;31(6):440-52.
- 617
- 618 13. Blum WE, Zechmeister-Boltenstern S, Keiblinger KM. Does Soil Contribute to the  
619 Human Gut Microbiome? *Microorganisms.* 2019 Sep;7(9):287.
- 620
- 621 14. Bolourian A, Mojtahedi Z. Streptomyces, shared microbiome member of soil and gut,  
622 as 'old friends' against colon cancer. *FEMS Microbiol Ecol.* 2018 Aug;94(8):fyy120.

## Aerobiome Vertical Stratification

- 623 15. Browne HP, Forster SC, Anonye BO, Kumar N, Neville BA, Stares MD, Goulding D,  
624 Lawley TD. Culturing of ‘unculturable’ human microbiota reveals novel taxa and  
625 extensive sporulation. *Nature*. 2016 May;533(7604):543-6.  
626
- 627 16. Briones MJ. Soil fauna and soil functions: a jigsaw puzzle. *Front Environ Sci*. 2014  
628 Apr 22;2:7.  
629
- 630 17. Cordeiro RA, Brilhante RS, Pantoja LD, Moreira Filho RE, Vieira PR, Rocha MF,  
631 Monteiro AJ, Sidrim JJ. Isolation of pathogenic yeasts in the air from hospital  
632 environments in the city of Fortaleza, northeast Brazil. *Braz J Infect Dis*. 2010 Jan  
633 1;14(1):30-4.  
634
- 635 18. Cox DT, Shanahan DF, Hudson HL, Fuller RA, Gaston KJ. The impact of  
636 urbanisation on nature dose and the implications for human health. *Landsc Urban*  
637 *Plan*. 2018 Nov 1;179:72-80.  
638
- 639 19. Crenna E, Sinkko T, Sala S. Biodiversity impacts due to food consumption in Europe.  
640 *J Clean Prod*. 2019 Aug 1;227:378-91.  
641
- 642 20. D’Argenio V, Salvatore F. The role of the gut microbiome in the healthy adult status.  
643 *Clin Chim Acta*. 2015 Dec 7;451:97-102.  
644
- 645 21. Daiber A, Lelieveld J, Steven S, Oelze M, Kröller-Schön S, Sørensen M, Münzel T.  
646 The “exposome” concept—how environmental risk factors influence cardiovascular  
647 health. *Acta Biochim Pol*. 2019 Sep 10;66(3):269-83.

## Aerobiome Vertical Stratification

- 648 22. Davis NM, Proctor DM, Holmes SP, Relman DA, Callahan BJ. Simple statistical  
649 identification and removal of contaminant sequences in marker-gene and  
650 metagenomics data. *Microbiome*. 2018 Dec;6(1):226.  
651
- 652 23. De Vos JM, Joppa LN, Gittleman JL, Stephens PR, Pimm SL. Estimating the normal  
653 background rate of species extinction. *Conserv Biol*. 2015 Apr;29(2):452-62.  
654
- 655 24. Dettwyler KA. *A time to wean: the hominid blueprint for the natural age of weaning*  
656 *in modern human populations*. In *Breastfeeding 2017* Sep 29 (pp. 39-74). Routledge.  
657
- 658 25. Dogan O, Gurcan OF. *Applications of Big Data and Green IoT-Enabling*  
659 *Technologies for Smart Cities*. In *Handbook of Research on Big Data and the IoT*  
660 2019 (pp. 22-41). IGI Global.  
661
- 662 26. Domingue, K.D. (2017). *Atmospheric Microbial Community Sampling System for*  
663 *Varying Altitude Collection*. Master of Science in Engineering Thesis. Western  
664 Michigan University.  
665
- 666 27. Dumbrell AJ. Size matters in regulating the biodiversity of tropical forest soils. *Mol*  
667 *Ecol*. 2019 Feb;28(3):525-7.  
668
- 669 28. Eisenhofer R, Minich JJ, Marotz C, Cooper A, Knight R, Weyrich LS. Contamination  
670 in low microbial biomass microbiome studies: issues and recommendations. *Trends*  
671 *Microbiol*. 2019 Feb 1;27(2):105-17.  
672

## Aerobiome Vertical Stratification

- 673 29. Escher BI, Hackermüller J, Polte T, Scholz S, Aigner A, Altenburger R, Böhme A,  
674 Bopp SK, Brack W, Busch W, Chadeau-Hyam M. From the exposome to mechanistic  
675 understanding of chemical-induced adverse effects. *Environ Int.* 2017 Feb 1;99:97-  
676 106.
- 677
- 678 30. Flies, E.J., Mavoa, S., Zosky, G.R., Mantzioris, E., Williams, C., Eri, R., Brook, B.W.  
679 and Buettel, J.C., 2019. Urban-associated diseases: Candidate diseases, environmental  
680 risk factors, and a path forward. *Environ Int*, 133, p.105187.
- 681
- 682 31. Franchi T. The Impact of the Covid-19 Pandemic on Current Anatomy Education and  
683 Future Careers: A Student's Perspective. *Anat Sci Educ.* 2020 May;13(3):312-5.
- 684
- 685 32. Gao NP, Niu JL. Modeling particle dispersion and deposition in indoor environments.  
686 *Atmos Environ.* 2007 Jun 1;41(18):3862-76.
- 687
- 688 33. Gellie NJ, Mills JG, Breed MF, Lowe AJ. Revegetation rewilds the soil bacterial  
689 microbiome of an old field. *Mol Ecol.* 2017 Jun;26(11):2895-904.
- 690
- 691 34. Gong J, Qi J, Beibei E, Yin Y, Gao D. Concentration, viability and size distribution of  
692 bacteria in atmospheric bioaerosols under different types of pollution. *Environ Pollut.*  
693 2020 Feb 1;257:113485.
- 694
- 695 35. Goryakin Y, Rocco L, Suhrcke M. The contribution of urbanization to non-  
696 communicable diseases: Evidence from 173 countries from 1980 to 2008. *Econ Hum*  
697 *Biol.* 2017 Aug 1;26:151-63.
- 698

## Aerobiome Vertical Stratification

- 699 36. Guo W, Li M, Dong Y, Zhou H, Zhang Z, Tian C, Qin R, Wang H, Shen Y, Du K,  
700 Zhao L. Diabetes is a risk factor for the progression and prognosis of COVID-19.  
701 *Diabetes/metabolism research and reviews*. 2020 Mar 31:e3319.  
702
- 703 37. Haahtela T, Holgate S, Pawankar R, Akdis CA, Benjaponpitak S, Caraballo L,  
704 Demain J, Portnoy J, von Hertzen L. The biodiversity hypothesis and allergic disease:  
705 world allergy organization position statement. *World Allergy Organization Journal*.  
706 2013 Dec 1;6(1):1-8.  
707
- 708 38. Haahtela T. A biodiversity hypothesis. *Allergy*. 2019 Aug;74(8):1445-56.  
709
- 710 39. Haas D, Galler H, Luxner J, Zarfel G, Buzina W, Friedl H, Marth E, Habib J,  
711 Reinthaler FF. The concentrations of culturable microorganisms in relation to  
712 particulate matter in urban air. *Atmos Environ*. 2013 Feb 1;65:215-22.  
713
- 714 40. Hake JF, Schlör H, Schürmann K, Venghaus S. Ethics, sustainability and the water,  
715 energy, food nexus approach—a new integrated assessment of urban systems. *Energy*  
716 *Procedia*. 2016 Jun 1;88:236-42.  
717
- 718 41. Hanski I. Biodiversity, microbes and human well-being. *Ethics Sci Environ Polit*.  
719 2014 Oct 27;14(1):19-25.  
720
- 721 42. Hanson MR, Giloteaux L. The gut microbiome in Myalgic Encephalomyelitis.  
722 *Biochem*. 2017 Apr 1;39(2):10-3.  
723

## Aerobiome Vertical Stratification

- 724 43. Heiman ML, Greenway FL. A healthy gastrointestinal microbiome is dependent on  
725 dietary diversity. *Mol Metab.* 2016 May 1;5(5):317-20.  
726
- 727 44. Hughes AC. Understanding the drivers of Southeast Asian biodiversity loss.  
728 *Ecosphere.* 2017 Jan;8(1):e01624.  
729  
730
- 731 45. Ingersoll J, Halliday M, Adams DJ, Auten JD, Ponce DM. Inflammatory markers  
732 limitations in the diagnosis of pediatric calcaneal osteomyelitis. *Am J Emerg Med.*  
733 2019 Nov 1;37(11):2119-e3.  
734
- 735 46. Joung YS, Ge Z, Buie CR. Bioaerosol generation by raindrops on soil. *Nat Comms.*  
736 2017 Mar 7;8:14668.  
737
- 738 47. Kiang KM, Ogunmodede F, Juni BA, Boxrud DJ, Glennen A, Bartkus JM, Cebelinski  
739 EA, Harriman K, Koop S, Faville R, Danila R. Outbreak of osteomyelitis/septic  
740 arthritis caused by *Kingella kingae* among child care center attendees. *Pediatrics.*  
741 2005 Aug 1;116(2):e206-13.  
742
- 743 48. Kowalski K, Mulak A. Brain-gut-microbiota axis in Alzheimer's disease. *J*  
744 *Neurogastroenterol Motil.* 2019 Jan;25(1):48.  
745
- 746 49. Levin PA, Angert ER. Small but mighty: cell size and bacteria. *Cold Spring Harb*  
747 *Perspect Biol.* 2015 Jul 1;7(7):a019216.  
748

## Aerobiome Vertical Stratification

- 749 50. Li W, Yang J, Zhang D, Li B, Wang E, Yuan H. Concentration and community of  
750 airborne bacteria in response to cyclical haze events during the fall and midwinter in  
751 Beijing, China. *Front Microbiol.* 2018 Jul 31;9:1741.
- 752
- 753 51. Liu H, Zhang X, Zhang H, Yao X, Zhou M, Wang J, He Z, Zhang H, Lou L, Mao W,  
754 Zheng P. Effect of air pollution on the total bacteria and pathogenic bacteria in  
755 different sizes of particulate matter. *Environ Pollut.* 2018 Feb 1;233:483-93.
- 756
- 757 52. Liddicoat C, Weinstein P, Bissett A, Gellie NJ, Mills JG, Waycott M, Breed MF. Can  
758 bacterial indicators of a grassy woodland restoration inform ecosystem assessment and  
759 microbiota-mediated human health?. *Environ Int.* 2019 Aug 1;129:105-17.
- 760
- 761 53. Liddicoat C, Sydnor H, Cando-Dumancela C, Dresken R, Liu J, Gellie NJ, Mills JG,  
762 Young JM, Weyrich LS, Hutchinson MR, Weinstein P. Naturally-diverse airborne  
763 environmental microbial exposures modulate the gut microbiome and may provide  
764 anxiolytic benefits in mice. *Sci Total Environ.* 2020 Jan 20;701:134684.
- 765
- 766 54. Long M. *A Biodiversity Survey of the Adelaide Park Lands, South Australia in 2003.*  
767 Biological Survey and Monitoring, Science and Conservation Directorate, Department  
768 for Environment and Heritage South Australia; 2003.
- 769
- 770 55. Maheshwari B, Pinto U, Akbar S, Fahey P. Is urbanisation also the culprit of climate  
771 change?—Evidence from Australian cities. *Urban Clim.* 2020 Mar 1;31:100581.
- 772
- 773 56. Maki T, Kurosaki Y, Onishi K, Lee KC, Pointing SB, Jugder D, Yamanaka N,  
774 Hasegawa H, Shinoda M. Variations in the structure of airborne bacterial communities

## Aerobiome Vertical Stratification

- 775 in Tsogt-Ovoo of Gobi desert area during dust events. *Air Quality, Atmosphere &*  
776 *Health*. 2017 Apr 1;10(3):249-60.
- 777
- 778 57. Macchi M, Martinez M, Tauil RN, Valacco MP, Morelli IS, Coppotelli BM. Insights  
779 into the genome and proteome of *Sphingomonas paucimobilis* strain 20006FA  
780 involved in the regulation of polycyclic aromatic hydrocarbon degradation. *World J*  
781 *Microbiol Biotechnol*. 2018 Jan 1;34(1):7.
- 782
- 783 58. Martinsen TC, Bergh K, Waldum HL. Gastric juice: a barrier against infectious  
784 diseases. *Basic Clin Pharmacol Toxicol*. 2005 Feb;96(2):94-102.
- 785
- 786 59. Martinson JN, Pinkham NV, Peters GW, Cho H, Heng J, Rauch M, Broadaway SC,  
787 Walk ST. Rethinking gut microbiome residency and the Enterobacteriaceae in healthy  
788 human adults. *ISME J*. 2019 Sep;13(9):2306-18.
- 789
- 790 60. Mbareche H, Veillette M, Pilote J, Létourneau V, Duchaine C. Bioaerosols play a  
791 major role in the nasopharyngeal microbiota content in agricultural environment. *Int J*  
792 *Environ Res Public Health*. 2019 Jan;16(8):1375.
- 793
- 794 61. McArdle AJ, Kaforou M. Sensitivity of shotgun metagenomics to host DNA:  
795 abundance estimates depend on bioinformatic tools and contamination is the main  
796 issue. *Access Microbiology*. 2020 Apr;2(4):e000104.
- 797
- 798 62. McCall LI, Anderson VM, Fogle RS, Haffner JJ, Hossain E, Liu R, Ly AH, Ma H,  
799 Nadeem M, Yao S. Characterization of the workplace chemical exposome using  
800 untargeted LC-MS/MS: a case study. *bioRxiv*. 2019 Jan 1:541813.



## Aerobiome Vertical Stratification

- 801
- 802 63. McMurdie PJ, Holmes S. phyloseq: an R package for reproducible interactive analysis  
803 and graphics of microbiome census data. *PloS One*. 2013;8(4).
- 804
- 805 64. Mhuireach G, Johnson BR, Altrichter AE, Ladau J, Meadow JF, Pollard KS, Green  
806 JL. Urban greenness influences airborne bacterial community composition. *Sci Total*  
807 *Environ*. 2016 Nov 15;571:680-7.
- 808
- 809 65. Mhuireach GÁ, Betancourt-Román CM, Green JL, Johnson BR. Spatiotemporal  
810 controls on the urban aerobiome. *Front Ecol Evol*. 2019 Mar 11;7:43.
- 811
- 812 66. Milani C, Duranti S, Bottacini F, Casey E, Turrone F, Mahony J, Belzer C, Palacio  
813 SD, Montes SA, Mancabelli L, Lugli GA. The first microbial colonizers of the human  
814 gut: composition, activities, and health implications of the infant gut microbiota.  
815 *Microbiol Mol Biol Rev*. 2017 Dec 1;81(4):e00036-17.
- 816
- 817 67. Miles DM. Vertical stratification of ammonia in a broiler house. *J Applied Poult Res*.  
818 2008 Oct 1;17(3):348-53.
- 819
- 820 68. Mills JG, Bissett A, Gellie NJ, Lowe AJ, Selway CA, Thomas T, Weinstein P,  
821 Weyrich LS, Breed MF. Revegetation of urban green space rewilds soil microbiotas  
822 with implications for human health and urban design. *Restor Ecol*. 2020 May 17.
- 823
- 824 69. Mincham KT, Jones AC, Bodinier M, Scott NM, Lauzon-Joset JF, Stumbles PA,  
825 Bosco A, Holt PG, Strickland DH. Centrality of the XBP1-ERN1 axis in

## Aerobiome Vertical Stratification

- 826           transplacental innate immune training via a microbial-derived immunomodulator.
- 827           *bioRxiv*. 2020 Jan 1:848242.
- 828
- 829       70. Moore RE, Townsend SD. Temporal development of the infant gut microbiome. *Open*
- 830           *Biol*. 2019 Sep 1;9(9):190128.
- 831
- 832       71. Nguyen HT, Pokhrel AR, Nguyen CT, Dhakal D, Lim HN, Jung HJ, Kim TS,
- 833           Yamaguchi T, Sohng JK. *Streptomyces* sp. VN1, a producer of diverse metabolites
- 834           including non-natural furan-type anticancer compound. *Sci Rep*. 2020 Feb 4;10(1):1-4.
- 835
- 836       72. Nguyen JC, Rebsamen SL, Tuite MJ, Davis JM, Rosas HG. Imaging of *Kingella*
- 837           kingae musculoskeletal infections in children: a series of 5 cases. *Emerg Radiol*. 2018
- 838           Dec 1;25(6):615-20.
- 839
- 840       73. Polkade AV, Mantri SS, Patwekar UJ, Jangid K. Quorum sensing: an under-explored
- 841           phenomenon in the phylum Actinobacteria. *Front Microbiol*. 2016 Feb 10;7:131.
- 842
- 843       74. Prescott SL, Larcombe DL, Logan AC, West C, Burks W, Caraballo L, Levin M, Van
- 844           Etten E, Horwitz P, Kozyrskyj A, Campbell DE. The skin microbiome: impact of
- 845           modern environments on skin ecology, barrier integrity, and systemic immune
- 846           programming. *World Allergy Organization Journal*. 2017 Dec;10(1):29.
- 847
- 848       75. RCPCH. (2020). *Growth charts*. Online. Available at:
- 849           <https://www.rcpch.ac.uk/resources/uk-who-growth-charts-2-18-years>\_Accessed on
- 850           21-01-2020.
- 851

## Aerobiome Vertical Stratification

- 852 76. Rizzatti G, Lopetuso LR, Gibiino G, Binda C, Gasbarrini A. Proteobacteria: a  
853 common factor in human diseases. *Biomed Res Int.* 2017;2017.  
854
- 855 77. Robinson JM, Mills JG, Breed MF. Walking ecosystems in microbiome-inspired  
856 green infrastructure: an ecological perspective on enhancing personal and planetary  
857 health. *Challenges.* 2018 Dec;9(2):40.  
858
- 859 78. Robinson JM, Breed MF. Green prescriptions and their co-benefits: integrative  
860 strategies for public and environmental health. *Challenges.* 2019 Jun;10(1):9.  
861
- 862 79. Robinson JM, Jorgensen A, Cameron R, Brindley P. Let Nature Be Thy Medicine: A  
863 Socioecological Exploration of Green Prescribing in the UK. *Int J Environ Res Public*  
864 *Health.* 2020 Jan;17(10):3460.  
865
- 866 80. Rook GA, Martinelli R, Brunet LR. Innate immune responses to mycobacteria and the  
867 downregulation of atopic responses. *Curr Opin Allergy Clin Immunol.* 2003 Oct  
868 1;3(5):337-42.  
869
- 870 81. Rook GA. Regulation of the immune system by biodiversity from the natural  
871 environment: an ecosystem service essential to health. *Proc Natl Acad Sci.* 2013 Nov  
872 12;110(46):18360-7.  
873
- 874 82. Rook GA, Raison CL, Lowry CA. *Microbiota, immunoregulatory old friends and*  
875 *psychiatric disorders.* In *Microbial Endocrinology: The Microbiota-Gut-Brain Axis in*  
876 *Health and Disease* 2014 (pp. 319-356). Springer, New York, NY.  
877

## Aerobiome Vertical Stratification

- 878 83. Rothschild D, Weissbrod O, Barkan E, Kurilshikov A, Korem T, Zeevi D, Costea PI,  
879 Godneva A, Kalka IN, Bar N, Shilo S. Environment dominates over host genetics in  
880 shaping human gut microbiota. *Nature*. 2018 Mar;555(7695):210-5.  
881
- 882 84. Schaechter M. *In the Company of Microbes: Ten Years of Small Things Considered*.  
883 John Wiley & Sons; 2016 May 2.  
884
- 885 85. Schmidt TS, Hayward MR, Coelho LP, Li SS, Costea PI, Voigt AY, Wirbel J,  
886 Maistrenko OM, Alves RJ, Bergsten E, de Beaufort C. Extensive transmission of  
887 microbes along the gastrointestinal tract. *Elife*. 2019 Feb 12;8:e42693.  
888
- 889 86. Shanahan DF, Astell–Burt T, Barber EA, Brymer E, Cox DT, Dean J, Depledge M,  
890 Fuller RA, Hartig T, Irvine KN, Jones A. Nature–based interventions for improving  
891 health and wellbeing: The purpose, the people and the outcomes. *Sports*. 2019  
892 Jun;7(6):141.  
893
- 894 87. Sokolowska M, Frei R, Lunjani N, Akdis CA, O’Mahony L. Microbiome and asthma.  
895 *Asthma Res Pract*. 2018 Dec;4(1):1.  
896
- 897 88. Sol D, González-Lagos C, Moreira D, Maspons J, Lapiedra O. Urbanisation tolerance  
898 and the loss of avian diversity. *Ecol Lett*. 2014 Aug;17(8):942-50.  
899
- 900 89. Stearns JC, Zulyniak MA, de Souza RJ, Campbell NC, Fontes M, Shaikh M, Sears  
901 MR, Becker AB, Mandhane PJ, Subbarao P, Turvey SE. Ethnic and diet-related  
902 differences in the healthy infant microbiome. *Genome Med*. 2017 Dec 1;9(1):32.  
903

## Aerobiome Vertical Stratification

- 904 90. Tham KW, Zuraimi MS. Abstract. *Indoor Air*. 2005 Jun;15:48-57.
- 905
- 906 91. Torres PJ, Ho BS, Arroyo P, Sau L, Chen A, Kelley ST, Thackray VG. Exposure to a  
907 healthy gut microbiome protects against reproductive and metabolic dysregulation in a  
908 PCOS mouse model. *Endocrinology*. 2019 May;160(5):1193-204.
- 909
- 910 92. Verma M, Lal D, Kaur J, Saxena A, Kaur J, Anand S, Lal R. Phylogenetic analyses of  
911 phylum Actinobacteria based on whole genome sequences. *Res Microbiol*. 2013 Sep  
912 1;164(7):718-28.
- 913
- 914 93. Von Hertzen L, Beutler B, Bienenstock J, Blaser M, Cani PD, Eriksson J, Färkkilä M,  
915 Haahtela T, Hanski I, Jenmalm MC, Kere J. Helsinki alert of biodiversity and health.  
916 *Ann Med*. 2015 Apr 3;47(3):218-25.
- 917
- 918 94. Watkins H, Robinson JM, Breed MF, Parker B, Weinstein P. Microbiome-Inspired  
919 Green Infrastructure: A Toolkit for Multidisciplinary Landscape Design. *Trends*  
920 *Biotechnol*. 2020 May 10.
- 921
- 922 95. While A, Whitehead M. Cities, urbanisation and climate change. *Urban Stud*. 2013  
923 May;50(7):1325-31.
- 924
- 925 96. Wickham, H. and Wickham, M.H. (2007). The ggplot package.
- 926
- 927 97. Wu J, Tang B, Bragazzi NL, Nah K, McCarthy Z. *Ontarians Need to Rapidly Increase*  
928 *their Personal Protection and Testing to Mitigate the COVID-19 Spread in the*  
929 *Province*. Available at SSRN 3569731. 2020 Apr 6.
- 930

## Aerobiome Vertical Stratification

- 931 98. Yang I, Corwin EJ, Brennan PA, Jordan S, Murphy JR, Dunlop A. The infant  
932 microbiome: implications for infant health and neurocognitive development. *Nurs*  
933 *Res.* 2016 Jan;65(1):76.  
934
- 935 99. Zarraonaindia I, Owens SM, Weisenhorn P, West K, Hampton-Marcell J, Lax S,  
936 Bokulich NA, Mills DA, Martin G, Taghavi S, van der Lelie D. The soil microbiome  
937 influences grapevine-associated microbiota. *MBio.* 2015 May 1;6(2):e02527-14.  
938
- 939 100. Zhang B, Wu X, Tai X, Sun L, Wu M, Zhang W, Chen X, Zhang G, Chen T, Liu G,  
940 Dyson P. Variation in Actinobacterial Community Composition and Potential Function  
941 in Different Soil Ecosystems Belonging to the Arid Heihe River Basin of Northwest  
942 China. *Front Microbiol.* 2019;10:2209.  
943
- 944 101. Zhu YG, Zhao Y, Zhu D, Gillings M, Penuelas J, Ok YS, Capon A, Banwart S. Soil  
945 biota, antimicrobial resistance and planetary health. *Environ Int.* 2019 Oct  
946 1;131:105059.
